# Supplementary material
Source: Elsevier journal article supplement (https://www.sciencedirect.com/science/article/pii/S1413355520306043)
Supplement: mmc1 [file S1413355520306043:mmc1.pdf]

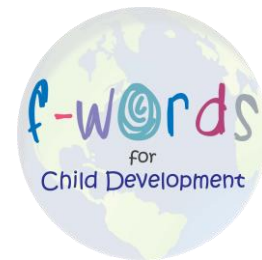

# Termo de Compromisso das Palavras Favoritas (F-words) de \_\_\_\_\_

☺ Por favor, considere tudo isso quando estivermos trabalhando juntos ☺

**FUNÇÃO** - Eu quero fazer as coisas! Não importa se eu não faço como a maioria das pessoas!

**FAMÍLIA** - Eles me conhecem muito bem e eu acredito que eles fazem o melhor para mim.

Ouçá-os. Converse com eles. Respeite-os...

**SAÚDE** - Todos precisam estar em forma e saudáveis e comigo não é diferente. Talvez eu precise de diferentes maneiras para estar em forma, e preciso de ajuda para fazer isso...

**DIVERSÃO** - Tudo o que me faz sorrir...

**AMIGOS** - Conhecer, encontrar, divertir, aprender e crescer com eles...

**FUTURO** - O futuro é agora - O amanhã é resultado do que eu faço hoje. Não quero que as oportunidades passem por mim sem que eu as aproveite. Ajude-me a alcançar o que eu posso hoje. Obrigado

Nome:

Data:

**Instruções:** Por favor, use esse formulário para escrever uma meta para cada uma das suas Palavras Favoritas (F-words – Função, Família, Saúde, Diversão, Amigos & Futuro) e explique o porquê elas são importantes para você. Elas podem ser metas que você gostaria de desenvolver em casa, na terapia, na escola e/ou na comunidade. Juntos, vamos em busca das metas que são importantes para você!

## FUNÇÃO:

Meta:

Por quê?!

## FAMÍLIA:

Meta:

Por quê?!

## SAÚDE:

Meta:

Por quê?!

## DIVERSÃO:

Meta:

Por quê?!

## AMIGOS:

Meta:

Por quê?!

## FUTURO:

Meta:

Por quê?!

# Colagem das Palavras Favoritas (F-words) de:

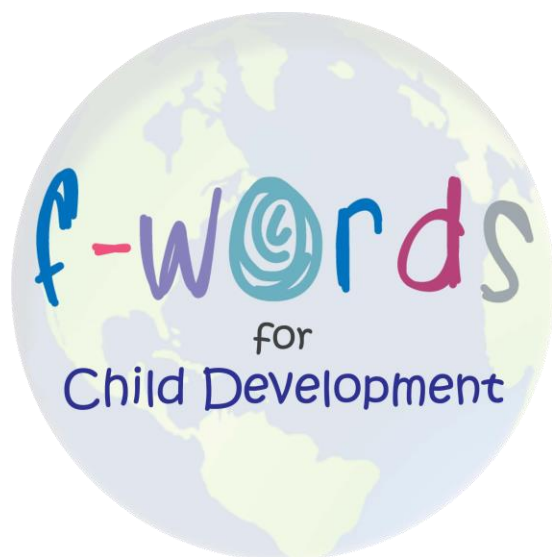

|          |         |        |
|----------|---------|--------|
|          |         |        |
| FUNÇÃO   | FAMÍLIA | SAÚDE  |
|          |         |        |
| DIVERSÃO | AMIGOS  | FUTURO |

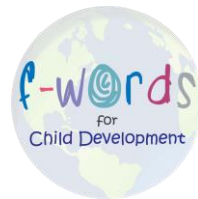

(nome)

Data de  
Nascimento:

Cidade:

Língua :

FUNÇÃO (O que eu faço ou como eu faço as "coisas"...):

FAMÍLIA (Minha família é...):

SAÚDE (Mantenho minha saúde em dia com...):

DIVERSÃO (Eu gosto de...):

AMIGOS (Meus amigos são...):

FUTURO (Minhas metas são...):
